# Supplementary material for: Synthesis and properties of near infrared-absorbing magnetic–optical nanopins
Source: Royal Society of Chemistry journal article supplement (doi:10.1039/c2nr31291c), 2012-01-01
Supplement: c2nr31291c.pdf [file c2nr31291c.pdf]

## Supporting information

### Synthesis and Properties of Near Infrared-absorbing Magnetic-optical Nanopins

*Saheel Bhana,<sup>a</sup> Binod K Rai,<sup>b</sup> Sanjay R Mishra,<sup>b</sup> Yongmei Wang<sup>a</sup> and Xiaohua Huang<sup>a, c, \*</sup>*

<sup>a</sup>Department of Chemistry, University of Memphis, Memphis, TN 38152

<sup>b</sup>Department of Physics, University of Memphis, Memphis, TN 38152

<sup>c</sup>Department of Biomedical Engineering, University of Memphis, Memphis, TN 38152

### ***Synthesis of IO-Au NPINs***

The IO-Au NPINs were synthesized according to a two-step procedure (see reference 17) with modifications. Firstly, 10  $\mu\text{L}$  of 10 mM  $\text{Ag}(\text{NH}_3)_2^+$  ions, which were prepared by mixing ammonia with  $\text{AgNO}_3$ , were added to 100  $\mu\text{L}$  of 1mg/mL IO NPs (SHP 25, Ocean Nanotech) and stirred for 30 min. After purification (by centrifugation) and reconstitution with 0.25 mL water, 100  $\mu\text{L}$  of 10 mM  $\text{NaBH}_4$  was added to reduce the silver ions. After 40 min, the Ag-decorated IO NPs were purified by three times of centrifugation and redispersed in 500  $\mu\text{L}$  water. Secondly, 1.5 mL of growth solution containing 0.4 mM  $\text{HAuCl}_4$ , 0.1 M CTAB and 0.08 mM  $\text{AgNO}_3$  was prepared, followed by addition of ascorbic acid (4 mM final concentration). Then, Ag-decorated IO NPs (22  $\mu\text{L}$ ) were injected and the solution changed to blue color within several minutes, indicating the growth of IO-Au NPINs. The same procedure was used to prepare spherical IO-Au NPs without silver nitrate in the growth solution and anisotropic IO-Au NPs with 5 time lower concentration of ascorbic acid.

### ***NP Characterization***

The absorption spectra of the IO and IO-Au NPINs were measured using a VIS-NIR absorption spectrometer (Ocean Optics, Dunedin, FL). The magnetic properties were measured using a vibration sample magnetometer (Dexing Magnets, China). The size and morphology of the NPs were examined with a JEM1200EX II TEM (JEOL Ltd, Tokyo, Japan).

### ***SERS measurement***

The IO-Au SERS NPs (nanospheres and nanopins) were prepared by direct adsorption of QSY 20 (Invitrogen, Grand Island, NY), followed by stabilization with mPEG-SH (Laysan Bio Inc, Arab, AL). The ratios of QSY and mPEG-SH to IO were  $5 \times 10^4$ . The SERS signals were collected from 0.01 nM IO-Au SERS NPs on a ProRaman-L porter Raman spectrometer (Enwave Optronics, Irvine, CA). The signals were detected with a CCD camera cool to  $-60^\circ\text{C}$ . The excitation wavelength was 785 nm and the power was 10 mW. The acquisition time was 0.1s.

### ***Photothermal experiment***

To examine the photothermal effect of the nanoparticles, 808 nm CW NIR light from a portable diode laser (Power technologies, Little Rock, AR) was delivered to the nanoparticle solution (100  $\mu\text{L}$ ) with specified concentration in a 1.7 mL microcentrifuge tube. The laser beam was 1 cm in diameter and the power density was 0.55 W/cm<sup>2</sup>. A thermocouple was inserted into the solution perpendicular to the laser path to measure the temperature of the solution.

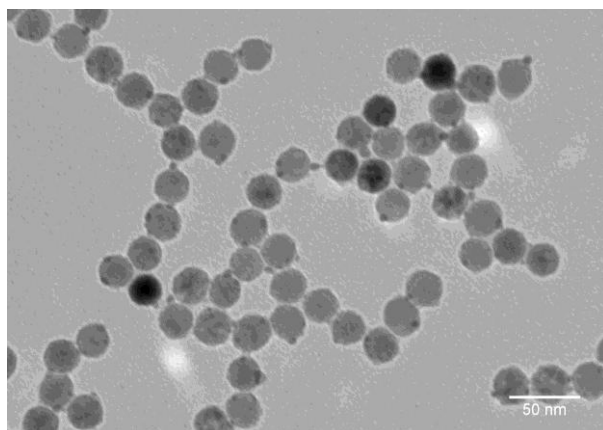

**Fig. S1** TEM image of Ag-decorated IO NPs.

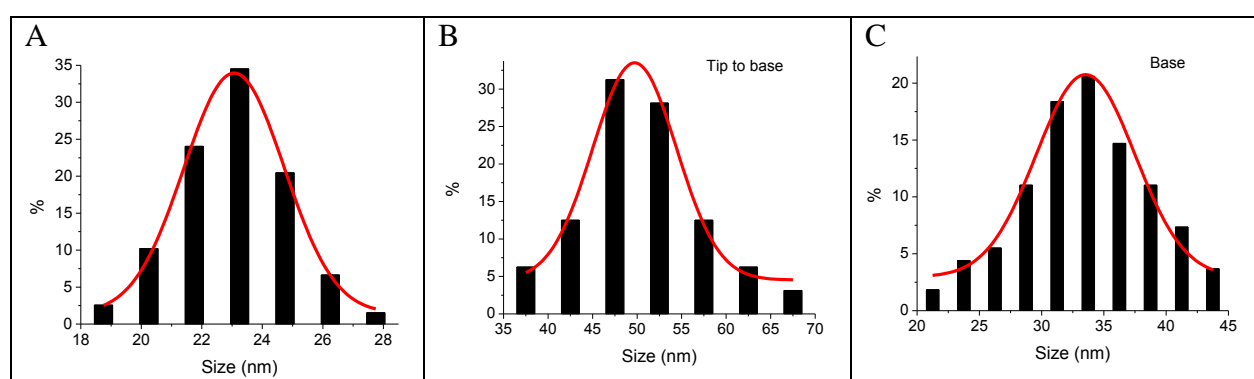

**Fig. S2** Size distribution of IO NPs (A) and IO-Au NPINs (B&C).

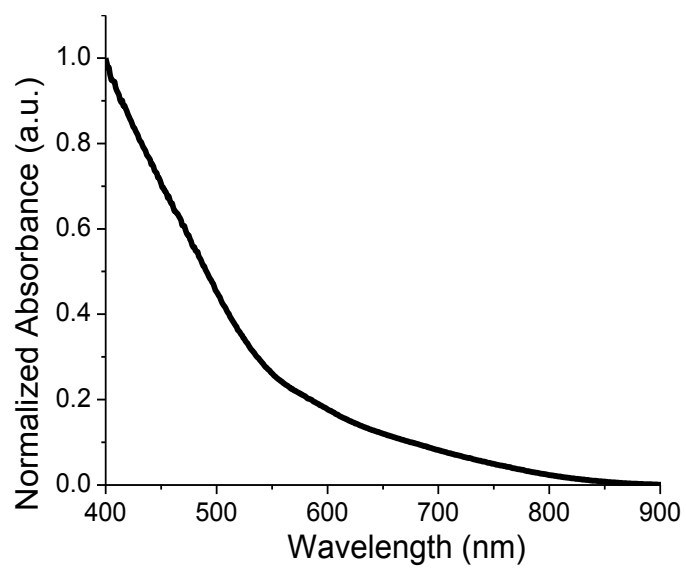

**Fig. S3** Absorption spectrum of IO NPs.

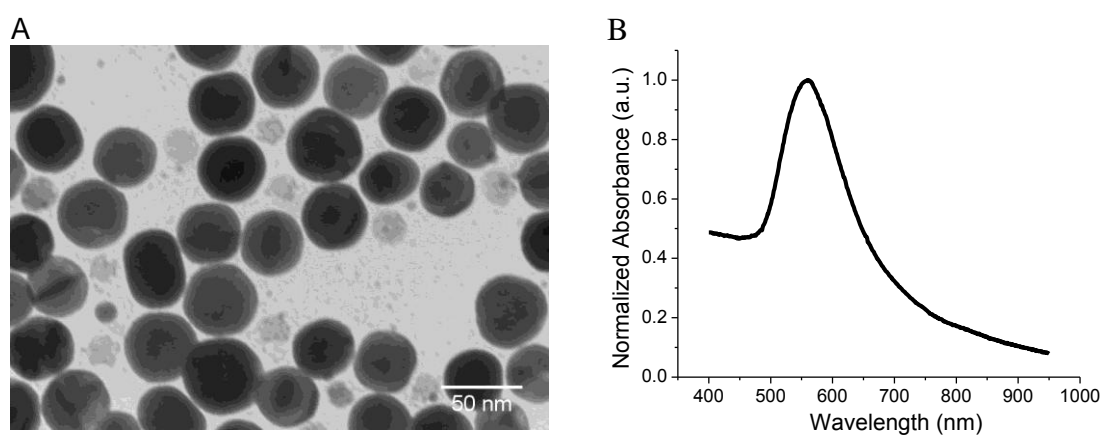

**Fig. S4** TEM image (A) and absorption spectrum (B) of IO-Au nanospheres. The NPs are 40-50 nm in size with SPR absorption around 560.
